# Supplementary material for: Understanding usual care for patients with multimorbidity: baseline data from a cluster-randomised trial of the 3D intervention in primary care
Source: PubMed Central journal article supplement (PMC6119425; doi:10.1136/bmjopen-2017-019845), 2018-08-29
Supplement: bmjopen-2017-019845supp001.pdf [file bmjopen-2017-019845supp001.pdf]

## **Appendix A Chronic conditions for inclusion**

We collected data on diagnoses of 17 conditions and combined these into 11 groups as shown below. Included patients must have diagnoses from three or more these groups of chronic conditions:

- Cardiovascular disease or Chronic kidney disease (including coronary heart disease, hypertension, heart failure, peripheral arterial disease, chronic kidney disease stage 3 to 5)\*
- Stroke
- Diabetes
- Chronic Obstructive Pulmonary Disease or Asthma\*
- Epilepsy
- Atrial fibrillation
- Severe mental health problems (schizophrenia or psychotic illness)\*
- Depression
- Dementia
- Learning disability
- Rheumatoid arthritis

\*Groups are counted only once even if a patient has multiple conditions within a group. For example, having both hypertension and heart failure would just count for one condition
