# Supplementary material for: Understanding usual care for patients with multimorbidity: baseline data from a cluster-randomised trial of the 3D intervention in primary care
Source: PubMed Central journal article supplement (PMC6119425; doi:10.1136/bmjopen-2017-019845), 2018-08-29
Supplement: bmjopen-2017-019845supp002.pdf [file bmjopen-2017-019845supp002.pdf]

**Practice:**

**Date:**

Please answer this questionnaire thinking about the patients with multi-morbidity in your practice. This will help us to understand your current approach and your perceptions about the care of these patients.

**Name (optional):**

**Role (required):**

| Please place an X in the box that is closest to your opinion                                            | Strongly disagree | Disagree | Neither agree or disagree | Agree | Strongly agree |
|---------------------------------------------------------------------------------------------------------|-------------------|----------|---------------------------|-------|----------------|
| 1. Patients' main concerns may be overlooked during review of their long-term conditions                |                   |          |                           |       |                |
| 2. Depression is difficult to identify reliably without using a measure (such as PHQ9)                  |                   |          |                           |       |                |
| 3. Poly-pharmacy is difficult for patients to manage                                                    |                   |          |                           |       |                |
| 4. Multi-morbidity is difficult for clinicians to manage                                                |                   |          |                           |       |                |
| 5. Patients with multi-morbidity have a special need for holistic, patient-centred care                 |                   |          |                           |       |                |
| 6. Holistic, patient-centred care is enhanced by continuity of care                                     |                   |          |                           |       |                |
| 7. Patients with 3 or more conditions need longer appointments to address all their concerns            |                   |          |                           |       |                |
| 8. Patients being reviewed for a long-term condition should be given a written care plan                |                   |          |                           |       |                |
| 9. Patients prefer it if I make a plan, instead of asking them what they would like to do               |                   |          |                           |       |                |
| 10. Patients are more likely to keep to goals and plans that they suggest themselves                    |                   |          |                           |       |                |
| 11. In this practice, the care patients receive for their long-term conditions is well-co-ordinated     |                   |          |                           |       |                |
| 12. In this practice, review of long-term conditions is too disease-orientated and not holistic enough. |                   |          |                           |       |                |

**Thank you for completing this questionnaire! Please return it to the 3D research team.**
